# Supplementary material
Source: publisher figshare collection journal article supplement (https://gsajournals.figshare.com/articles/dataset/_/7243292)
Supplement: Supplementary file 1 [file 1]

**Table S1. Yeast strains used in this study.**

| <b>Strain</b> | <b>Genotype</b>                                                            | <b>Reference</b>                                  |
|---------------|----------------------------------------------------------------------------|---------------------------------------------------|
| W1588-4C      | <i>MATa ade2-1 can1-100 his3-11,15 leu2-3,112 trp1-1 ura3-1</i>            | Thomas and Rothstein 1989, Zhao <i>et al</i> 1998 |
| YTT3320       | W1588-4C; <i>isw2Δ::NatMX</i>                                              | Au <i>et al</i> 2011                              |
| YTT6809       | W1588-4C; <i>isw2Δ::NatMX</i>                                              | this study                                        |
| YTT3333       | W1588-4C; <i>nhp10Δ::Hyg</i>                                               | Au <i>et al</i> 2011                              |
| YTT2060       | W1588-4C; <i>nhp10Δ::Hyg</i>                                               | Vincent <i>et al</i> 2008                         |
| YTT3337       | W1588-4C; <i>isw2Δ::NatMX nhp10Δ::HYG</i>                                  | Au <i>et al</i> 2011                              |
| YTT2109       | W1588-4C; <i>isw2Δ::NatMX nhp10Δ::HYG</i>                                  | Vincent <i>et al</i> 2008                         |
| YTT1996       | W1588-4C; <i>ISW2-K215R-3FLAG-KanMX</i>                                    | Gelbart <i>et al</i> 2005                         |
| YTT1997       | W1588-4C; <i>ISW2-K215R-3FLAG-KanMX</i>                                    | Gelbart <i>et al</i> 2005                         |
| YTT3426       | W1588-4C; <i>NHP10-3FLAG-KanMX</i>                                         | Vincent <i>et al</i> 2008                         |
| YTT3427       | W1588-4C; <i>NHP10-3FLAG-KanMX</i>                                         | Vincent <i>et al</i> 2008                         |
| YTT6639       | W1588-4C; <i>rpa49Δ::KanMX</i>                                             | this study                                        |
| YTT6673       | W1588-4C; <i>isw2Δ::NatMX nhp10Δ::Hyg RPA190-2L-3FLAG::KanMX</i>           | this study                                        |
| YTT6679       | W1588-4C; <i>RPA190-2L-3FLAG::KanMX</i>                                    | this study                                        |
| YTT6686       | W1588-4C; <i>RPO31-2L-3FLAG::KanMX</i>                                     | this study                                        |
| YTT6693       | W1588-4C; <i>isw2Δ::NatMX nhp10Δ::Hyg RPO31-2L-3FLAG::KanMX</i>            | this study                                        |
| YTT6915       | W1588-4C; <i>Pol2-2L-3FLAG::KanMX</i>                                      | this study                                        |
| YTT6916       | W1588-4C; <i>Pol2-2L-3FLAG::KanMX</i>                                      | this study                                        |
| YTT6917       | W1588-4C; <i>isw2Δ::NatMX Pol2-2L-3FLAG::KanMX</i>                         | this study                                        |
| YTT6918       | W1588-4C; <i>isw2Δ::NatMX Pol2-2L-3FLAG::KanMX</i>                         | this study                                        |
| YTT6919       | W1588-4C; <i>nhp10Δ::Hyg Pol2-2L-3FLAG::KanMX</i>                          | this study                                        |
| YTT6920       | W1588-4C; <i>nhp10Δ::Hyg Pol2-2L-3FLAG::KanMX</i>                          | this study                                        |
| YTT6921       | W1588-4C; <i>isw2Δ::NatMX nhp10Δ::Hyg Pol2-2L-3FLAG::KanMX</i>             | this study                                        |
| YTT6922       | W1588-4C; <i>isw2Δ::NatMX nhp10Δ::Hyg Pol2-2L-3FLAG::KanMX</i>             | this study                                        |
| YTT7009       | W1588-4C; <i>Fob1-2L-3FLAG::KanMX</i>                                      | this study                                        |
| YTT7010       | W1588-4C; <i>Fob1-2L-3FLAG::KanMX</i>                                      | this study                                        |
| YTT7011       | W1588-4C; <i>isw2Δ::NatMX Fob1-2L-3FLAG::KanMX</i>                         | this study                                        |
| YTT7012       | W1588-4C; <i>isw2Δ::NatMX Fob1-2L-3FLAG::KanMX</i>                         | this study                                        |
| YTT7013       | W1588-4C; <i>nhp10Δ::Hyg Fob1-2L-3FLAG::KanMX</i>                          | this study                                        |
| YTT7014       | W1588-4C; <i>nhp10Δ::Hyg Fob1-2L-3FLAG::KanMX</i>                          | this study                                        |
| YTT7015       | W1588-4C; <i>isw2Δ::NatMX nhp10Δ::Hyg Fob1-2L-3FLAG::KanMX</i>             | this study                                        |
| YTT7016       | W1588-4C; <i>isw2Δ::NatMX nhp10Δ::Hyg Fob1-2L-3FLAG::KanMX</i>             | this study                                        |
| YSI101        | <i>MATa ade2-1 can1-100 his3-11,15 leu2-3,112 trp1-1 ura3-1 fob1::LEU2</i> | Ide <i>et al</i> 2010                             |
| YSI102        | YSI101; 20 copies rDNA                                                     | Ide <i>et al</i> 2010                             |
| YSI103        | YSI101; 40 copies rDNA                                                     | Ide <i>et al</i> 2010                             |
| YSI104        | YSI101; 80 copies rDNA                                                     | Ide <i>et al</i> 2010                             |
| YTT6294       | YSI102; <i>isw2Δ::NatMX</i>                                                | this study                                        |
| YTT6865       | YSI102; <i>nhp10Δ::HYG</i>                                                 | this study                                        |
| YTT6311       | YSI102; <i>isw2Δ::NatMX nhp10Δ::Hyg</i>                                    | this study                                        |
| YTT6312       | YSI102; <i>isw2Δ::NatMX nhp10Δ::Hyg</i>                                    | this study                                        |

|         |                                                                                                          |  |
|---------|----------------------------------------------------------------------------------------------------------|--|
| YTT3383 | <i>MATa ade2-1::pRS402 can1-100 his3-11,15 leu2-3,112 trp1-1 ura3-1::pRS406</i>                          |  |
| YTT3385 | <i>MATa ade2-1::pRS402 can1-100 his3-11,15 leu2-3,112 trp1-1 ura3-1::pRS406 isw2Δ::NatMX</i>             |  |
| YTT3387 | <i>MATa ade2-1::pRS402 can1-100 his3-11,15 leu2-3,112 trp1-1 ura3-1::pRS406 nhp10Δ::HYG</i>              |  |
| YTT3388 | <i>MATa ade2-1::pRS402 can1-100 his3-11,15 leu2-3,112 trp1-1 ura3-1::pRS406 isw2Δ::NatMX nhp10Δ::HYG</i> |  |

**Table S2. Primers used in this study.**

| Name        | Comment                         | Sequence                                                     |
|-------------|---------------------------------|--------------------------------------------------------------|
| ETS1-1      | 5' ETS1 qPCR                    | TGGGTTGATGCGTATTGAGA                                         |
| ETS1-2      | 3' ETS1 qPCR                    | TCGCTGATTTGAGAGGAGGT                                         |
| ALG9-1      | 5' ALG9 qPCR                    | CACGGATAGTGGCTTTGGTGAACAATTAC (TESTE <i>et al.</i> 2009)     |
| ALG9-2      | 3' ALG9 qPCR                    | TATGATTATCTGGCAGCAGGAAAGAACTTGGG (TESTE <i>et al.</i> 2009)  |
| ITS1-6      | 5' ITS1 qPCR                    | TGTTTTGGCAAGAGCATGAG                                         |
| ITS1-7      | 3' ITS1 qPCR                    | TCGAATGCCCAAAGAAAAAG                                         |
| RFB-1       | 5' RFB qPCR, probe              | gcgggggtctagaCCACTGTTCACTGTTCACTGTTCA                        |
| RFB-2       | 3' RFB qPCR, probe              | cccggcgctagcAGAGAAGGGCTTTCACAAAGCT                           |
| rDNA_ETS1-1 | 5' ETS1 probe                   | CCATTCCGTGAAACACC                                            |
| rDNA_ETS1-2 | 3' ETS1 probe                   | AAGAAAGAAACCGAAATCTC                                         |
| AG_Fob1_1   | 5' Fob1 Gibson cloning (insert) | ctcactatagggcggaattgggtaccgggccTTAATAATGTACTTTGCAGATGTTTGTTC |
| AG_Fob1_3   | 3' Fob1 Gibson cloning (insert) | cgcggtggcgccgctctagaactagtgggaCTAATGATAATGGCTTTCTATTTGTTTTGC |
| AG_Fob1_2   | 5' Fob1 Gibson cloning (vector) | GGAACAAACATCTGCAAAGTACATTATTAAGgcccggtagccaattcgccctatagttag |
| AG_Fob1_4   | 3' Fob1 Gibson cloning (vector) | GCAAAACAAATAGAAAGCCATTATCATTAGtccactagttctagagcggccgccaccgcg |

Teste, M. A., M. Duquenne, J. M. Francois and J. L. Parrou, 2009 Validation of reference genes for quantitative expression analysis by real-time RT-PCR in *Saccharomyces cerevisiae*. BMC Mol Biol 10: 99.

**Table S3. Plasmids used in this study.**

| Name        | Description                                        |
|-------------|----------------------------------------------------|
| pRS426      | URA3, 2 $\mu$                                      |
| pRS426-Fob1 | pRS426 with <i>FOB1</i> promoter and coding region |
