# Supplementary material
Source: publisher figshare collection journal article supplement (https://gsajournals.figshare.com/articles/dataset/_/7243292)
Supplement: Supplementary file 2 [file 1]

**A**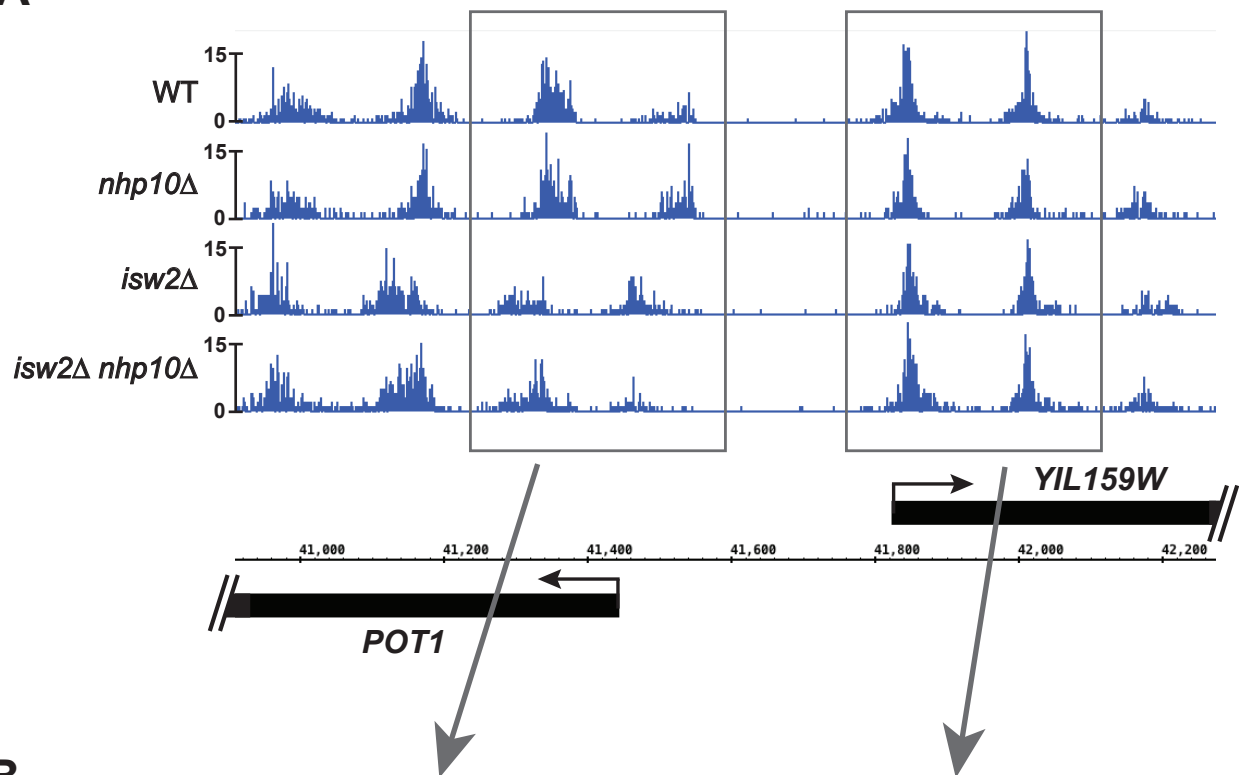**B**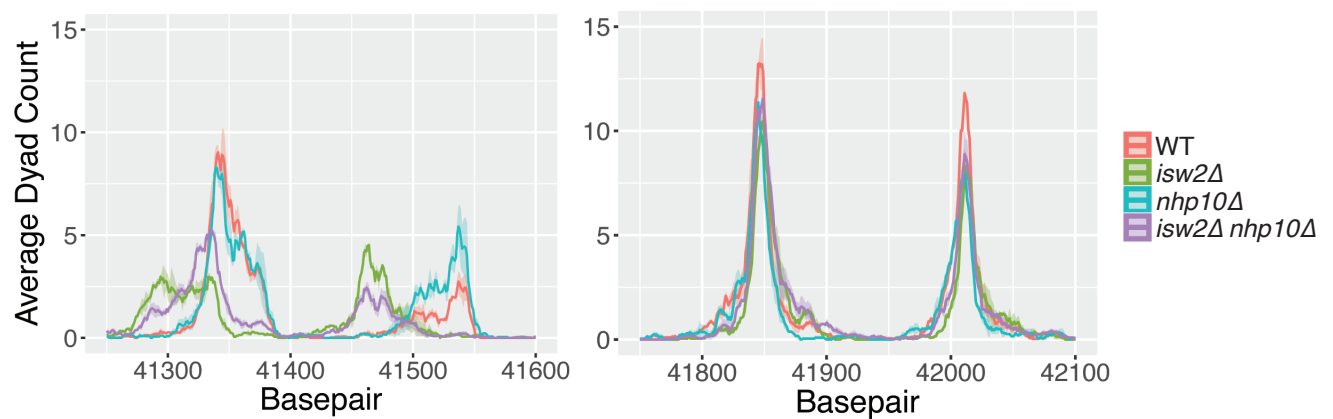

**Figure S1. Nucleosome positioning changes at a canonical *Isw2* target.** (A) MNase-seq data at a well-established *Isw2* target, the 5' end of the *POT1* gene. (B) Visualization of the same data shown in Figure S2A with the ribbon plots used in Figure 3B, focusing on two pairs of nucleosomes.
