# Supplementary material
Source: publisher figshare collection journal article supplement (https://gsajournals.figshare.com/articles/dataset/_/7243292)
Supplement: Supplementary file 3 [file 1]

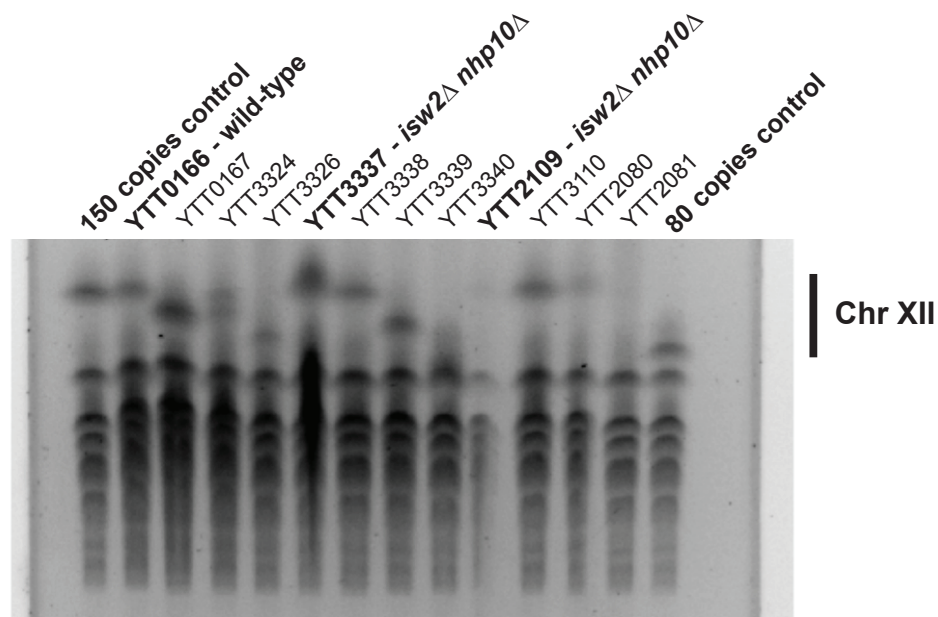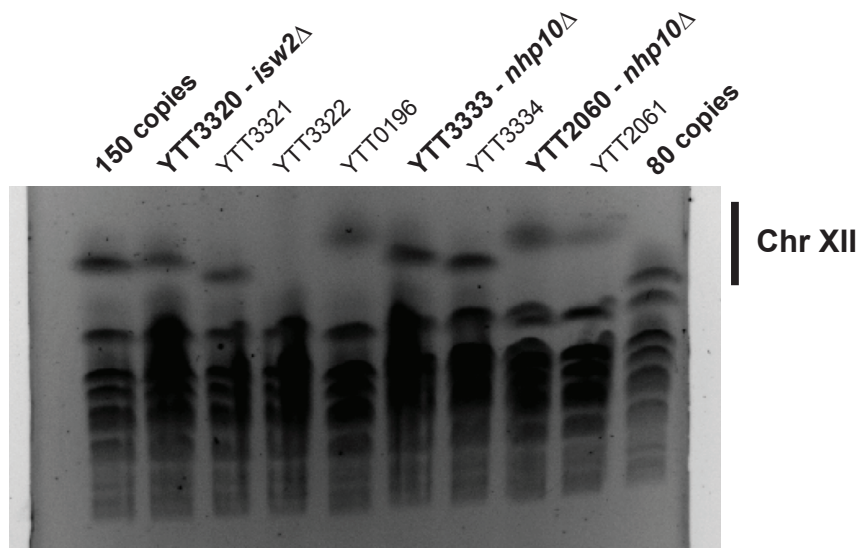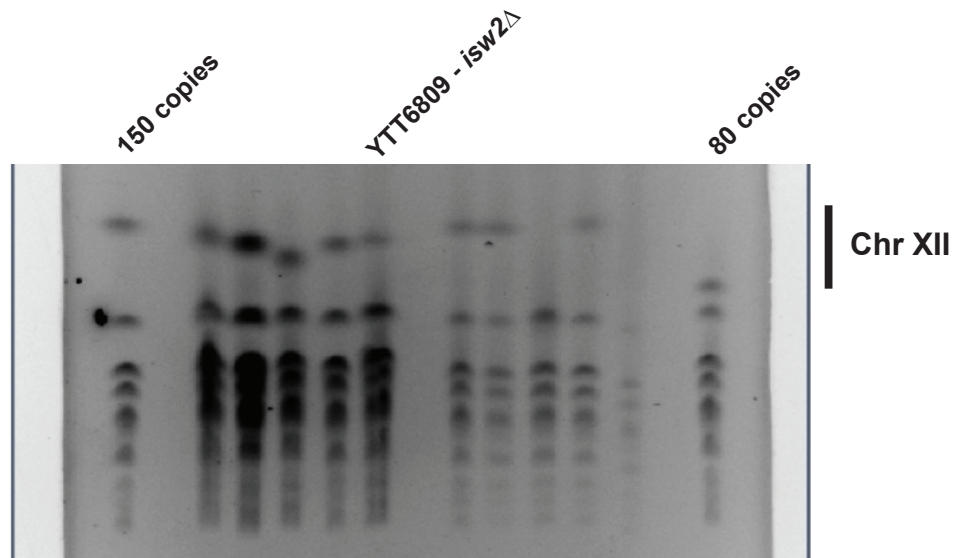

**Figure S3. Strains used in this study have approximately 150 rDNA repeats.** Two different ethidium bromide-stained CHEF gels in which un-digested DNA was run, allowing for visualization of whole chromosomes. On each gel, control strains containing 150 or 80 rDNA repeats are run on the outside lanes as references. Most bands have migrated the same distance across all strains, indicating those chromosomes are the same size in those strains, with the exception of the rDNA-containing Chr. XII, which is indicated. The major strains used for most of the experiments in this study (excluding the rDNA copy number assays) are highlighted by bold text and a blue border.
