# Supplementary material
Source: publisher figshare collection journal article supplement (https://gsajournals.figshare.com/articles/dataset/_/7243292)
Supplement: Supplementary file 4 [file 1]

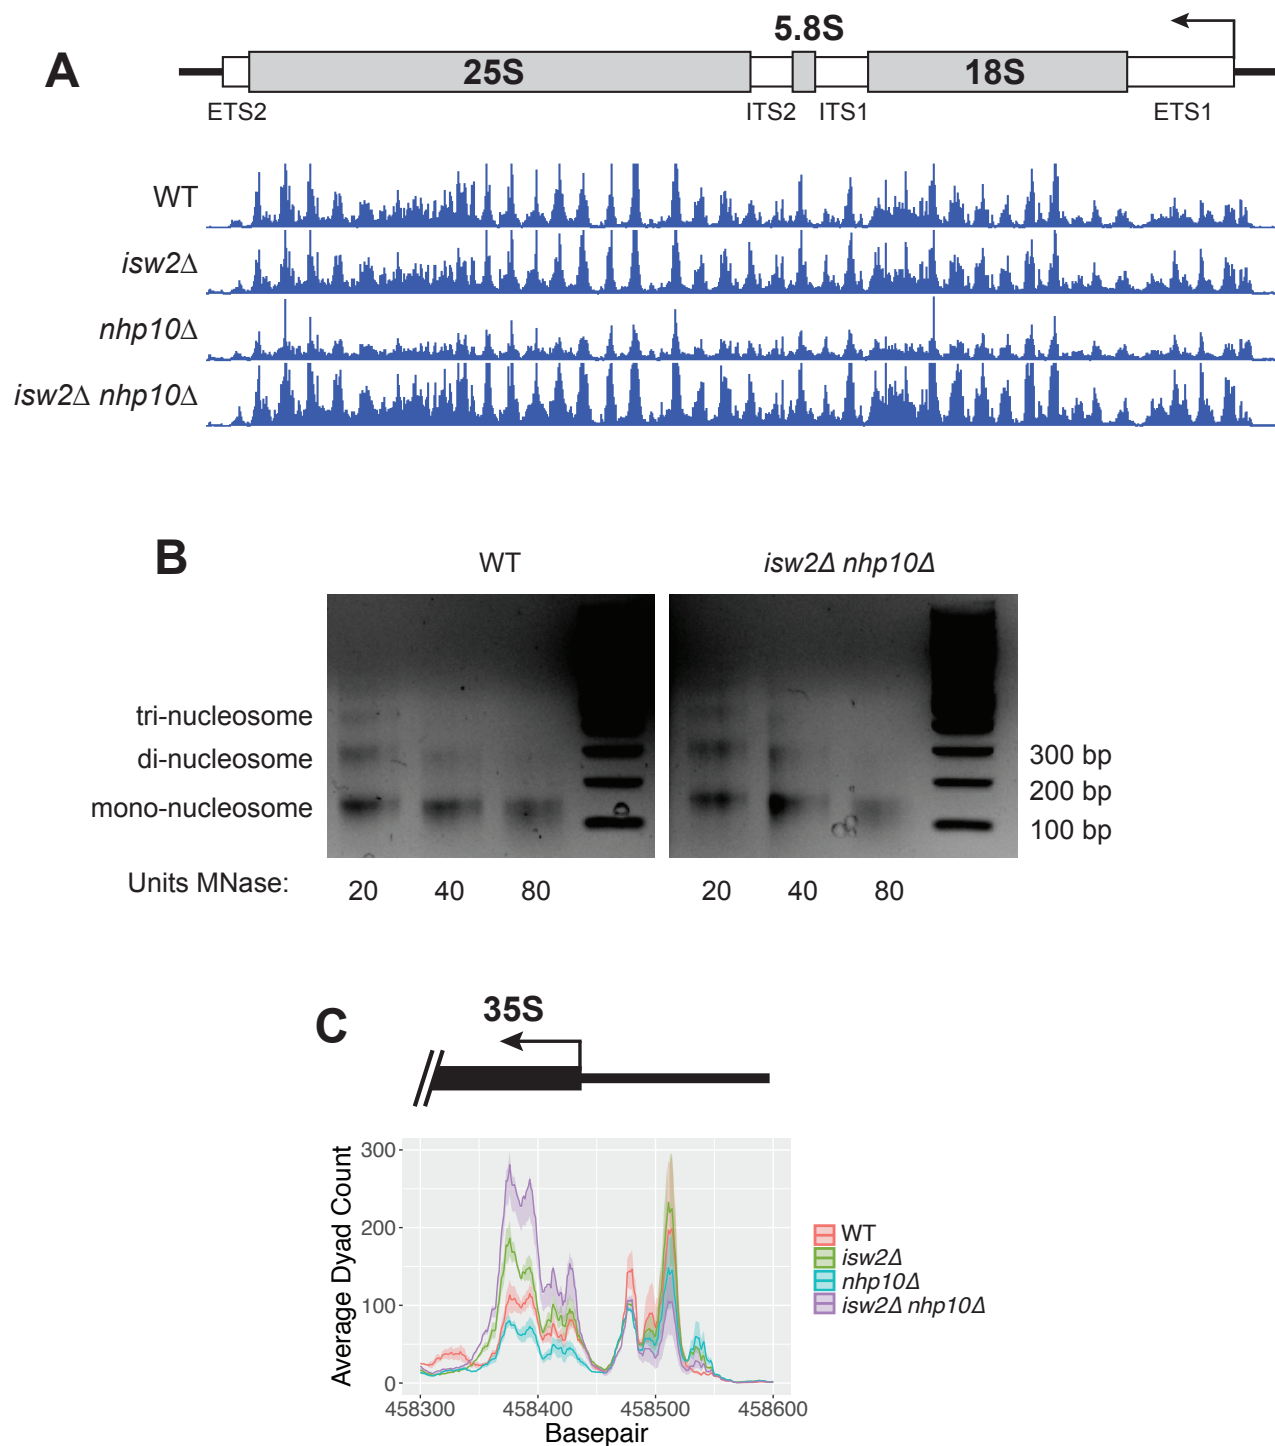

**Figure S2. Nucleosome positioning in single and double mutants throughout the rDNA.**

(A) MNase-seq data analyzed with dyad mapping showing the entire 35S rRNA gene. No stark differences in nucleosome positioning can be seen. (B) Representative gel indicating how nucleosomal ladders appear after digestion with 20, 40, or 80 units of MNase. Note that for all MNase-seq analyses, regardless of level of digestion, the mono-nucleosomal band was gel-purified and was the sole source of material that was deep sequenced. (C) MNase-seq ribbon plot at the 35S promoter region showing no appreciable difference in nucleosome positioning across the strains tested.
